# Supplementary material for: Small Animals, Big Impact? Early Farmers and Pre- and Post-Harvest Pests from the Middle Neolithic Site of Les Bagnoles in the South-East of France (L’Isle-sur-la-Sorgue, Vaucluse, Provence-Alpes-Côte-d’Azur)
Source: MDPI journal article supplement (doi:10.3390/ani12121511), 2022-06-09
Supplement: s1 [file s1]

**Supplementary Materials:**

**Figure S1 a, b, c:** Section of well 250 (a), 990 (b) and 994 (c) with height information (m) and sequence of samples from top to bottom, dug spits (20-10 cm artificial levels). The investigation of small mammals and invertebrates was carried out in the lowest, waterlogged layers. US = stratigraphic unit. From: van Willigen et al. 2020 [23] simplified.

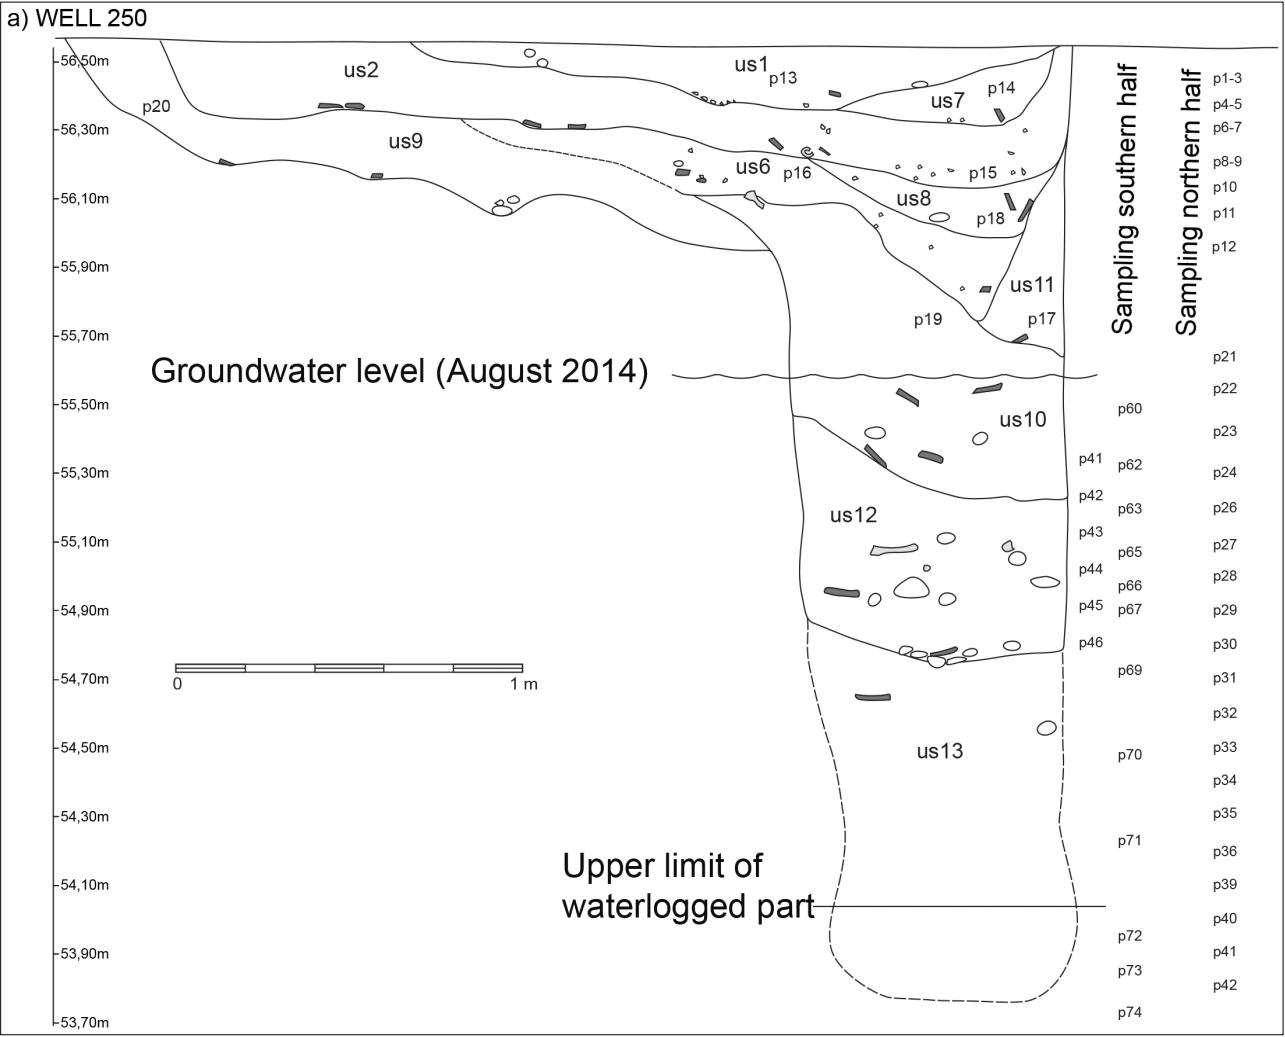

b) WELL 990

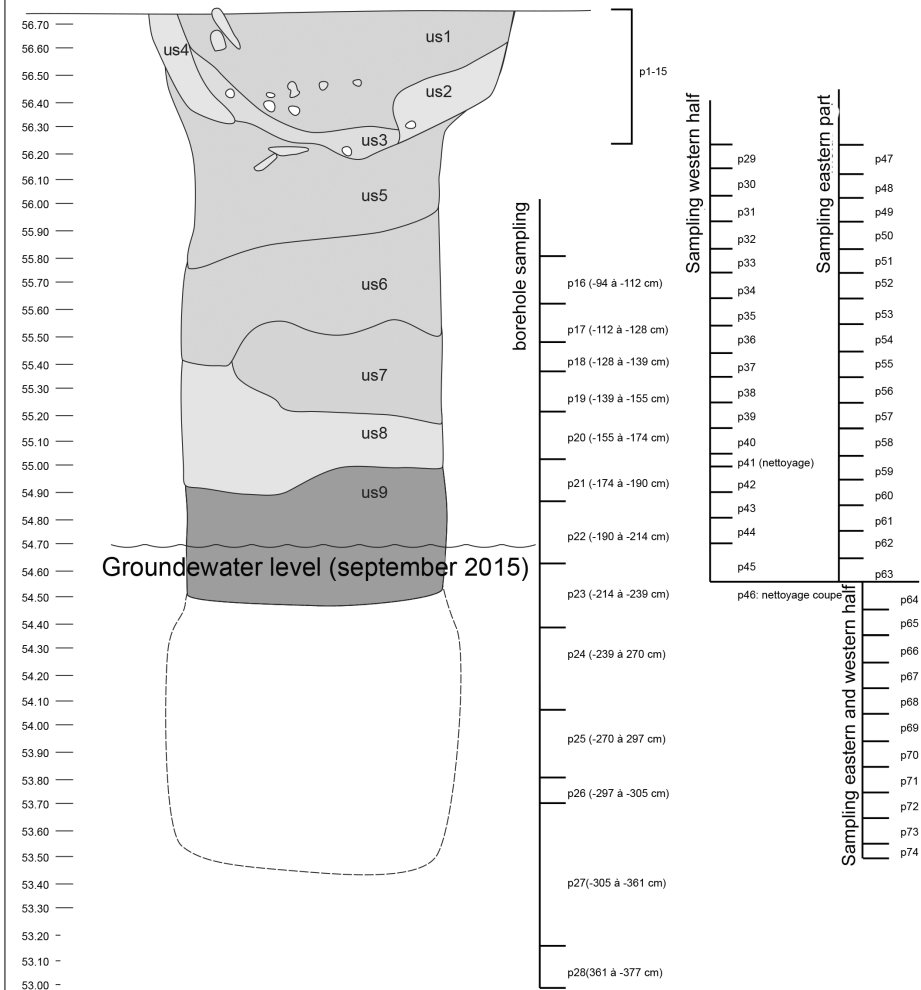

c) WELL 994

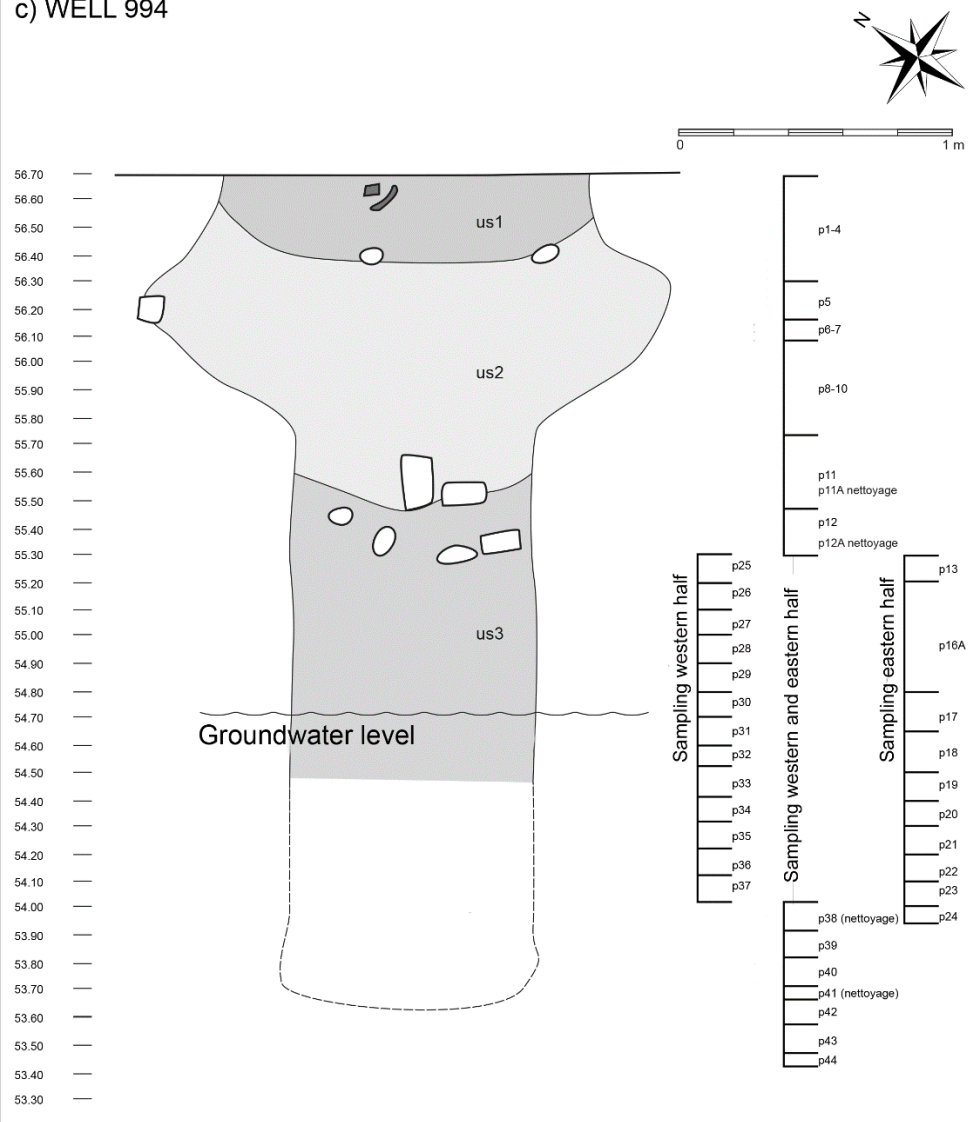

**Table S1:** Summery table of semi quantified elements present in the organic fractions of the sieved sediment samples with an interpretation of the quality of preservation (see criteria in [79], total volume (l) of sediment samples and the examined sample volumes and fractions for invertebrate and small mammal remains.

| Well | Sample Nr. | Maximum depth (m asl) | Minimum depth (m asl) | Sediment sample total volume (l) | Pretreatment     | Water-logged preservation | Observations during sorting organic fractions |                                      |          |          |               |                      | Invertebrate remains                 |                                | Small mammal remains                   |                              |
|------|------------|-----------------------|-----------------------|----------------------------------|------------------|---------------------------|-----------------------------------------------|--------------------------------------|----------|----------|---------------|----------------------|--------------------------------------|--------------------------------|----------------------------------------|------------------------------|
|      |            |                       |                       |                                  |                  |                           | Dung                                          | Quality preservation (plant remains) | Molluscs | Bones    | Insects       | Bioturbation (roots) | Examined volume (l) organic fraction | Analysed organic fractions for | Examined volume (l) inorganic fraction | Analysed inorganic fractions |
| 250  | 24         | 55.47                 | 55.37                 | 17                               | Freezing         | yes                       |                                               | very bad                             |          |          |               |                      | 17                                   | 0.35 mm                        |                                        |                              |
| 250  | 27         | 55.27                 | 55.17                 | 14                               | -                | yes                       |                                               | very bad                             | abundant | abundant | present       |                      | 14                                   | 0.35 mm                        |                                        |                              |
| 250  | 28         | 55.17                 | 55.07                 | 12.5                             | -                | yes                       |                                               | very bad                             | abundant | abundant |               |                      | 12.5                                 | 0.35 mm                        |                                        |                              |
| 250  | 32         | 54.77                 | 54.67                 | 28                               | Freezing+Calgon  | yes                       | charred                                       | very bad                             |          |          |               |                      | 28                                   | 0.35 mm                        |                                        |                              |
| 250  | 33         | 54.67                 | 54.57                 | 26.5                             | Freezing+Calgon  | yes                       |                                               | very bad                             | abundant | present  | present       |                      | 26.5                                 | 1/0.35 mm                      |                                        |                              |
| 250  | 34         | 54.57                 | 54.47                 | 29                               | Freezing+Calgon  | yes                       |                                               | very bad                             | abundant | abundant | present       |                      | 29                                   | 1/0.35 mm                      |                                        |                              |
| 250  | 36         | 54.37                 | 54.27                 | 7.5                              | Freezing         | yes                       | present                                       | medium                               |          |          | present       | yes                  | 7.5                                  | 1/0.35 mm                      |                                        |                              |
| 250  | 37         | no info               | no info               | 3                                | Freezing         | yes                       |                                               | low                                  |          |          |               | yes                  | 3                                    | 0.35 mm                        |                                        |                              |
| 250  | 38         | 54.27                 | 54.17                 | 26                               | Freezing+Calgon  | yes                       | present                                       | medium                               |          |          | present       | yes                  | 6                                    | 1/0.35 mm                      |                                        |                              |
| 250  | 39         | 54.17                 | 54.07                 | 29.5                             | Freezing         | yes                       | present                                       | medium                               | present  | medium   | present       | yes                  | 6                                    | 4/1/0.35 mm                    |                                        |                              |
| 250  | 40         | 54.07                 | 53.97                 | 21.5                             | Freezing         | yes                       | present                                       | good                                 | abundant |          | present       | yes                  | 6                                    | 4/1/0.35 mm                    | 15.5                                   | 4/1 mm                       |
| 250  | 41         | 53.97                 | 53.87                 | 23.5                             | Freezing         | yes                       | present                                       | good                                 | present  |          | present       | yes                  | 7                                    | 1/0.35 mm                      | 23                                     | 4/1 mm                       |
| 250  | 42         | 53.87                 | 53.8                  | 14                               | Freezing         | yes                       | present                                       | medium                               | present  |          | present       | yes                  | 6                                    | 1/0.35 mm                      | 8                                      | 4/1 mm                       |
| 250  | 73         | 53.97                 | 53.77                 | 23.5                             | Freezing         | yes                       | present                                       | medium                               |          | present  |               | yes                  |                                      |                                | 23.5                                   | 4/1 mm                       |
| 250  | 74         | 53.77                 | no info               | 8                                | Freezing         | yes                       | present                                       | medium                               | abundant | present  | abundant      | yes                  |                                      |                                | 8                                      | 4/1 mm                       |
| 990  | 25         | 53.8                  | 54.06                 | 0.9                              | Calgon           | yes                       | abundant                                      | medium                               | present  | abundant | abundant      | yes                  |                                      |                                | 0.9                                    | 4/1 mm                       |
| 990  | 26         | 53.72                 | 53.8                  | 0.4                              | Calgon           | yes                       |                                               |                                      |          | present  | abundant      |                      | 0.4                                  | 4/1/0.35 mm                    | 0.4                                    | 4/1 mm                       |
| 990  | 28         | 53                    | 53.16                 | 0.4                              | Calgon           | yes                       |                                               |                                      |          | present  | present       |                      | 0.4                                  | 4/1/0.35 mm                    |                                        |                              |
| 990  | 68         | 54.06                 | 54.16                 | 59                               | -                | no                        |                                               |                                      |          |          | present       | yes                  | 8                                    | 0.35 mm                        | 50                                     | 4/1 mm                       |
| 990  | 69         | 53.94                 | 54.06                 | 28                               | -                | yes                       | abundant                                      | good                                 |          |          | abundant      | yes                  | 7                                    | 1/0.35 mm                      | 28                                     | 4/1 mm                       |
| 990  | 70         | 53.84                 | 53.94                 | 88                               | Calgon           | yes                       | abundant                                      | good                                 |          | present  | very abundant | yes                  | 9                                    | 4/1/0.35 mm                    | 88                                     | 4/1 mm                       |
| 990  | 71         | 53.76                 | 53.84                 | 84.5                             | -                | yes                       | abundant                                      | good                                 |          | present  | abundant      |                      | 7                                    | 4/1/0.35 mm                    | 63.5                                   | 4/1 mm                       |
| 990  | 72         | 53.66                 | 53.76                 | 78.5                             | -                | yes                       | present                                       | good                                 |          |          | present       | yes                  | 8                                    | 4/1/0.35 mm                    | 56                                     | 4/1 mm                       |
| 990  | 73         | 53.58                 | 53.66                 | 26                               | Calgon           | yes                       | present                                       | good                                 | present  | abundant | abundant      |                      | 9                                    | 4 mm                           | 26                                     | 4/1 mm                       |
| 990  | 74         | 53.5                  | 53.58                 | 34                               | -                | yes                       | very abundant                                 | excellent                            |          |          | very abundant |                      | 9                                    | 4/1/0.35 mm                    | 34                                     | 4/1 mm                       |
| 994  | 20         | 54.3                  | 54.42                 | 0.2                              | Freezing         | yes                       | no                                            | low                                  | no       | no       | abundant      |                      | 0.2                                  | 1/0.35 mm                      |                                        |                              |
| 994  | 41         | 53.7                  | 53.72                 | 31.5                             | Freezing +Calgon | yes                       | no                                            | low                                  | abundant | present  | very abundant |                      | 16                                   | 1/0.35 mm                      | 31.5                                   | 4/1 mm                       |
| 994  | 42         | 53.6                  | 53.7                  | 53.5                             | Freezing+Calgon  | yes                       | present                                       | medium                               | abundant | abundant | abundant      | yes                  | 16                                   | 4/1/0.35 mm                    | 53.5                                   | 4/1 mm                       |
| 994  | 43         | 53.5                  | 53.6                  | 54.5                             | Freezing+Calgon  | yes                       | no                                            | low                                  | abundant | present  | abundant      |                      | 17                                   | 4/1/0.35 mm                    | 47                                     | 4/1 mm                       |
| 994  | 44         | 53.65                 | 53.5                  | 32.5                             | Freezing         | yes                       | no                                            | low                                  | abundant |          | abundant      |                      | 18                                   | 4/1/0.35 mm                    | 23.5                                   | 4/1 mm                       |
| 994  | 45         | 53.6                  | no info               | 17                               | Freezing         | yes                       | no                                            | low                                  | abundant |          | abundant      |                      | 17                                   | 4/1/0.35 mm                    | 8                                      | 4/1 mm                       |

**Figure S2:** Single plots of the radiocarbon dates of 250, 990 and 994 wells. In red are indicated the *Apodemus* and *Apodemus/Muridae*. Calibration with OxCal v4.4.4 (Bronk Ramsey 2009) [80] and IntCal20 atmospheric curve (Reimer et al. 2020) [81].

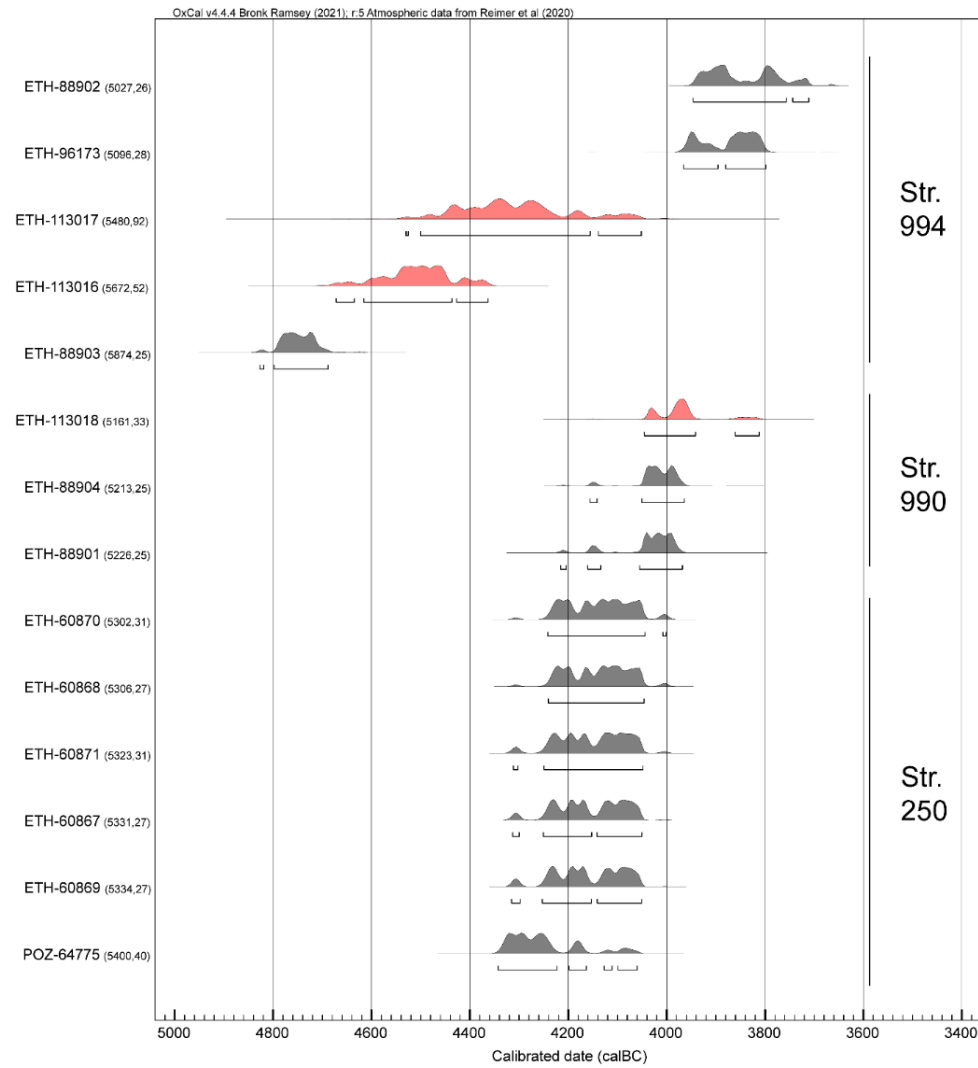

Figure S3: Contemporary test results for 250, 990 and 994 wells

well 250

| Structure | Sample | Specie                  | Lab code  | BP   | ±  | δ <sup>13</sup> C (‰) | C/N | Method | cal BC 2σ  | Observations | Reference                 |
|-----------|--------|-------------------------|-----------|------|----|-----------------------|-----|--------|------------|--------------|---------------------------|
| 250       | Grain  | Cerealia                | ETH-60867 | 5331 | 27 | -21.4                 | nd  | AMS    | 4314 -4051 |              | Martínez-Grau et al. 2020 |
| 250       | Fruit  | <i>Corylus avellana</i> | ETH-60868 | 5306 | 27 | -24                   | nd  | AMS    | 4241 -4047 |              | Martínez-Grau et al. 2020 |
| 250       | Grain  | Cerealia                | ETH-60869 | 5334 | 27 | -20.5                 | nd  | AMS    | 4316 -4052 |              | Martínez-Grau et al. 2020 |
| 250       | Grain  | <i>Triticum</i> sp.     | ETH-60870 | 5302 | 31 | -22.4                 | nd  | AMS    | 4242 -4001 |              | Martínez-Grau et al. 2020 |
| 250       | Grain  | Cerealia                | ETH-60871 | 5323 | 31 | -24.2                 | nd  | AMS    | 4312 -4049 |              | Martínez-Grau et al. 2020 |
| 250       | Grain  | <i>Triticum</i> sp.     | POZ-64775 | 5400 | 40 | nd                    | nd  | AMS    | 4344 -4061 |              | Martínez-Grau et al. 2020 |

| X <sup>2</sup> test | df | T   | p-value (5%) |  | BP   | SD | cal BC (95.4%) |
|---------------------|----|-----|--------------|--|------|----|----------------|
| well 250            | 2  | 4.7 | 11.1         |  | 5327 | 13 | 4236-4057      |

X2 test

df = 5      T = 4.7    p-value (5%) = 11.1  
well 250 = 5327BP, 13SD = 4236-4057 cal BC (95.4%)

well 990

| Structure | Sample | Specie                                    | Lab code   | BP   | ±  | δ <sup>13</sup> C (‰) | C/N   | Method | cal BC 2σ  | Observations           | Reference                 |
|-----------|--------|-------------------------------------------|------------|------|----|-----------------------|-------|--------|------------|------------------------|---------------------------|
| 990       | Grain  | <i>Triticum aestivum /durum /turgidum</i> | ETH-88901  | 5226 | 25 | -24.6                 | 18.62 | AMS    | 4216 -3969 |                        | Martínez-Grau et al. 2020 |
| 990       | Grain  | <i>Triticum aestivum /durum /turgidum</i> | ETH-88904  | 5213 | 25 | -24.8                 | 18.96 | AMS    | 4157 -3965 |                        | Martínez-Grau et al. 2020 |
| 990       | Bone   | <i>Apodemus / Muridae</i>                 | ETH-113018 | 5161 | 33 | -19.8                 | 2.8   | GIS    | 4046 -3812 | C/N ratio out of range | this paper                |

| X <sup>2</sup> test | df | T   | p-value (5%) |  | BP   | SD | cal BC (95.4%) |
|---------------------|----|-----|--------------|--|------|----|----------------|
| well 990            | 2  | 2.6 | 6.0          |  | 5207 | 16 | 4046-3972      |

X2 test

df = 2      T = 2.6    p-value (5%) = 6.0  
well 990 = 5207BP 16SD = 4046-3972 cal BC (95.4%)

well 994

| Structure | Sample | Specie                     | Lab code  | BP   | ±  | δ <sup>13</sup> C (‰) | C/N   | Method | cal BC 2σ  | Observations | Reference                 |
|-----------|--------|----------------------------|-----------|------|----|-----------------------|-------|--------|------------|--------------|---------------------------|
| 994       | Grain  | <i>Triticum monococcum</i> | ETH-88902 | 5027 | 26 | -16.3                 | 36.72 | AMS    | 3947 -3712 |              | Martínez-Grau et al. 2020 |
| 994       | Grain  | <i>Triticum monococcum</i> | ETH-96173 | 5096 | 28 | -23.7                 | 15.3  | AMS    | 3967 -3799 |              | Jesus et al. 2021         |

| X <sup>2</sup> test | df | T   | p-value (5%) |  | BP   | SD | cal BC (95.4%) |
|---------------------|----|-----|--------------|--|------|----|----------------|
| well 994            | 1  | 3.3 | 3.8          |  | 5059 | 20 | 3949-3796      |
